# Supplementary material for: TET2 mutations in acute myeloid leukemia: a comprehensive study in patients of Sindh, Pakistan
Source: PeerJ. 2021 Feb 9;9:e10678. doi: 10.7717/peerj.10678 (PMC7901355; doi:10.7717/peerj.10678)
Supplement: Supplemental Information 2 [file peerj-09-10678-s002.xlsx]

## Sheet: Sheet1
Patient ID	Gene	Allele	Exon	Nucleotide	Type of mutation	Amino acid	(position in mature	Remarks
							protein)	(Novel/Reported)	Age	Sex	Ethnicity	AML Subtype	Clinical Features	Hemoglobin	RBCs	WBCs	Platelets	Blasts	Treatment Status	Cytogenetics
266	TET-2	2	Exon 3	del.ATAGATAG	DELETION	None	Intronic region	Reported	28Y	M	Pashto	Acute megakaryoblastic leukemia	Fever, generalized weakness, pallor, hepatosplenomegaly	7.8	2.7	6.3	9	0.74	No	46,XY(20)
277	TET-2	2	Exon 3	del.ATAGATAG	DELETION	None	Intronic region	Reported	44Y	M	Punjabi	AML with maturation	Fever, generalized weakness, splenomegaly	9.8	3	5.7	70	0.17	Yes	46,XY(20)
3262	TET-2	2	Exon 3	del.ATAGATAG	DELETION	None	Intronic region	Reported	24y	F	Urdu	AML with maturation.	Fever, pallor, generalized weakness, lymphadenopathy	8.9	2.71	16.91	9	0.73	No	46,XX(20)
412	TET-2	1	Exon 3	ins.ATAG	INSERTION	None	Intronic region	Not Reported	16y	F	Urdu	AML with maturation.	Generalized weakness, weight loss, gum bleeding	8.1	2.63	13.01	28	0.66	No	46,XX(20)
3281	TET-2	1	Exon 3	del.ATAGATAG	DELETION	None	Intronic region	Reported	28Y	M	Sindhi	AML with maturation.	Fever, generalised weakness, weight loss	6.5	1.75	5.75	12	0.52	No	50,XY,+X,+6,+8,+21(05)/46,XY(12)
3245	TET-2	1	Exon 3	del.ATAGATAG	DELETION	None	Intronic region	Reported	46y	M	Sindhi	AML with maturation.	Fever, weight loss, generalized weakness, hepatosplenomegaly	6.1	2.13	34	89	0.35	No	46,XY(20)
278	TET-2	1	Exon 3	del.ATAGATAG	DELETION	None	Intronic region	Reported	42y	M	Urdu	AML with minimal differentiation	Fever, generalized weakness, weight loss	11.2	4	0.9	312	0.02	Yes	46,XY(20)
3244	TET-2	1	Exon 3	del.ATAGATAG	DELETION	None	Intronic region	Reported	28y	F	Urdu	AML with maturation.	Fever, generalized weakness, hepatosplenomegaly	8.8	3.84	16.8	8	0.45	No	45,XX,-7(20)
33	TET-2	1	Exon 3	del.ATAGATAG	DELETION	None	Intronic region	Reported	26y	F	Punjabi	AML without maturation	Fever, generalized weakness, splenomegaly	10.9	3.86	8.14	26	0.32	No	46,XX,del(20q)(08)/46,XX(07)
154	TET-2	1	Exon 3	del.ATAGATAG	DELETION	None	Intronic region	Reported	50y	F	Urdu	AML with maturation.	Fever, generalized weakness, weight loss, gum bleeding	8.5	2.76	4.13	8	70	No	45,XX,t(8;21)(q22;q22),-11(11)/46,XX(04)
145	TET-2	1	Exon 3	del.ATAGATAG	DELETION	None	Intronic region	Reported	22y	M	Sindhi	AML with maturation.	Fever, generalized weakness, weight loss	8.2	3	2.2	16	0.67	No	46,XY(20)
167	TET-2	1	Exon 3	del.ATAGATAG	DELETION	None	Intronic region	Reported	38y	M	Punjabi	AML with maturation.	Fever, generalized weakness, splenomegaly	6.2	2.2	0.6	35	21	Yes	46,XY(20)
139	TET-2	1	Exon 3	del.ATAGATAG	DELETION	None	Intronic region	Reported	51y	M	Urdu	Acute myelomonocytic leukemia	Fever, gum bleeding, splenomegaly	6.7	2.1	15.8	27	0.18	Yes	46,XY(20)
168	TET-2	1	Exon 3	del.ATAGATAG	DELETION	None	Intronic region	Reported	45y	M	Urdu	AML without maturation	Fever, gum bleeding, splenomegaly	7.9	2.98	43.61	10	0.33	No	46,XY,t(8;21)(q22;q22)(05)/46,XX(08)
406	TET-2	1	Exon 3	del.ATAGATAG	DELETION	None	Intronic region	Reported	28y	M	Sindhi	AML with maturation.	Fever, generalised weakness, weight loss	6.5	1.75	5.75	12	0.52	No	50,XY,+X,+6,+8,+21(05)/46,XY(12)
357	TET-2	1	Exon 3	del.A	DELETION	None	None	Not Reported	60Y	M	Urdu	AML without maturation	Fever, generalized weakness, weight loss	8.7	2.7	24.7	26	81	No	46,XY(20)
357	TET-2	1	Exon 3	ins.GGGACAATGACTGTTCCATTGTGTTCTGAGAAAACAAGACCAATGTCA	INSERTION	None	Intronic region	Not Reported	60Y	M	Urdu	AML without maturation	Fever, generalized weakness, weight loss	8.7	2.7	24.7	26	81	No	46,XY(20)
743	TET-2	1	Exon 3	del.C	DELETION	None	Intronic region	Not Reported	50Y	M	Urdu	AML without maturation	Fever, weight loss, splenomegaly	5.8	1.83	9.06	18	0.78	No	46,XY(20)
743	TET-2	1	Exon 3	T	STOPGAIN	None	Intronic region	Not Reported	50Y	M	Urdu	AML without maturation	Fever, weight loss, splenomegaly	5.8	1.83	9.06	18	0.78	No	46,XY(20)
759	TET-2	1	Exon 3	del.GGTGCCTCC	DELETION	None	Intronic region	Not Reported	28Y	M	Urdu	AML without maturation	Fever, generalized weakness, splenomegaly	7.7	2.84	129	28	0.83	No	46,XY(20)
898	TET-2	1	Exon 5	T	STOPGAIN	None	Intronic region	Not Reported	40Y	M	Urdu	AML with maturation	Fever, vomiting, generalized weakness, gum bleeding, splenomegaly, lymphadenopathy.	10.2	3.26	9.78	27	0.3	No	46,XY(20)
