# Supplementary material for: TET2 mutations in acute myeloid leukemia: a comprehensive study in patients of Sindh, Pakistan
Source: PeerJ. 2021 Feb 9;9:e10678. doi: 10.7717/peerj.10678 (PMC7901355; doi:10.7717/peerj.10678)
Supplement: Supplemental Information 11 [file peerj-09-10678-s011.xlsx]

## Sheet: Patients clinical information
Study code	Age	Sex	Ethinic Group	Diagnosis	Co-Morbidity Disease History	Induction Chemotherapy Status	Personal History	Clinical Details	Hb	Rbc's	Wbc	Platelets	Blast	Cytogenetics
1975	38	1	2	3	1	1	4	1	12.1	4.5	16	92	72	46,XY,t(15;17)(q22;2q.12)(12)/46,XY(03)
1977	47	2	1	5	5	1	4	1,2,6,7	9.8	3.05	168	62	21	Not Done.
2012	60	1	1	2	5	2	3	1,2,10	7.3	2.25	49.6	17	98	Not Done.
2027	40	1	3	5	5	1	1	1,4	8	2.69	8.1	60	0	Not Done.
2029	40	1	3	5	5	2	1	1,4,7	9.5	3.67	41.2	47	52	46,XY,(20)
2134	30	2	2	5	5	2	4	s	8.6	2.9	83.9	65	81	Not Done.
2575	28	2	4	3	5	2	4	1,4	8.3	3.1	27.48	11	0.65	Not Done.
2613	50	1	1	2	5	2	4	1,2,3,4	8.8	3	75.8	13	0.92	Not Done.
2644	28	1	3	2	5	2	1	1,8	6.1	2	38.3	17	0.8	46, XY (20)
2650	38	2	5	11	1	1	4	2,4	11.8	3.8	6.2	232	0.02	46,XX(20)
2694	60	2	1	2	2	2	4	1,2,7,8	6.1	2.37	70.1	21	0.9	46, XX (20)
2718	44	1	2	3	2	1	4	2,4,5	9.3	4.5	43.6	243	0	46, XY (20)
2773	23	1	5	3	5	1	1	4,8	9.2	2.84	77.1	100	0	46, XY, del 5(q31.1)(20)
2901	40	1	1	3	5	2	4	1,4 ,6,9	10.2	3.26	9.78	27	0.3	46, XY (20)
1699	17	1	2	1	5	1	1,2	2,4,5	7.6	2.7	1.6	61	86	N/A
1833	51	1	1	3	2	2	1	1,2,4,5	6.7	2.1	15.8	27	0.18	46, XY (20)
2770	44	1	3	3	2,3	1	4	2,5,12	9.8	3	5.7	70	0.17	46,XY(20)
3424	28	1	1	7	5	2	4	1,4	7.8	2.7	6.3	9	0.74	46, XY (20)
1678	38	1	3	3	5	1	1	2,4,9	6.2	2.2	0.6	35	21	46,XY(20)
1725	50	2	1	3	5	1	1	1,4,5,6	8.5	2.76	4.13	8	70	45,XX,t(8;21)(q22;q22),-11(11)/46,XX(04)
3244	28	2	1	3	5	2	1	1,4,10,13	8.8	3.84	16.8	8	0.45	45,XX,-7(20)
3245	46	1	2	3	5	2	1	1,4,5,10,13	6.1	2.13	34	89	0.35	46,XY(20)
3262	24	2	1	3	5	1	4	1,3,7	8.9	2.71	16.91	9	0.73	46,XX(20)
3281	28	1	2	3	5	2	4	1,4,5	6.5	1.75	5.75	12	0.52	50,XY,+X,+6,+8,+21(05)/46,XY(12)
2859	22	1	2	3	5	2	1	1,4,5	8.2	3.66	2.2	16	0.67	46,XY(20)
2726	42	1	1	1	5	2	4	1,4,5	8.2	4.1	0.9	31	0.02	46,XY(20)
2530	16	2	1	3	5	2	1	4,5,6	8.1	2.63	13.01	28	0.66	46,XX(20)
2561	28	1	2	1	4	1	4	1,2,4,10,13	6.5	1.75	5.75	12	0.52	50,XY,+X,+6,+8,+21(05)/46,XY(12)
2194	26	2	3	2	5	2	4	1.4.9	10.9	3.86	8.14	26	0.32	46,XX,t(8;21)(q22;q22)(05)/46,XX(08)
2201	45	1	1	2	5	2	4	1,4,9	7.9	2.98	43.61	10	0.33	46,XX,del(20q)(08)/46,XX(07)
1813	30	1	4	2	5	2	1	1,2,4	9.6	3.7	25.7	9	36	N/A
1825	32	1	2	4	5	1	1	1,2,4	9.5	3.3	36.5	5	0	46, XY (20)
1836	51	1	1	14	1	1	4	2,4	12.7	4.1	6	75	57	46, XY (20)
1859	44	2	2	3	5	2	1	1,2,7	10.1	3.6	2.88	23	49	N/A
1889	17	2	2	1	5	2	1	1,3,4,6,10,13	8.5	2.8	4.3	23	0.96	46, XY (15)
1896	33	1	1	3	2	1	1	1,2,4	8	2.6	58.2	33	0.01	46, XY (15)
1902	24	1	5	1	5	2	4	1,2,4,9	9.4	3.2	79.1	38	0.93	N/A
1905	51	1	1	13	1	1	1	1,2	11.8	4.19	11.9	225	0.06	N/A
1906	26	2	2	13	1	1	1	2,4,5	9.3	3.67	1.22	158	0.03	N/A
1910	75	1	2	4	5	1	4	1,4,10	8.5	2.5	99.8	42	0	N/A
1919	50	1	2	4	5	1	1	2,4,5	7.6	2.7	95.1	9	0	46, XY (15)
1943	17	2	5	1	5	2	4	2,4,9	7.5	2.4	81.6	44	0.94	Hyperdiploidy(01)/46,XX(11)
1959	25	1	1	2	5	2	4	1,2,4,6	7.2	2.6	5.05	20	0.92	46, XY (15)
2469	45	1	2	12	3	2	1	1,4,6	8.5	3.1	4.6	4	0.5	46,XY(20)
2809	26	1	1	1	5	2	4	1,7	11.8	4.22	3	150	0.6	46,XY(20)
2018	21	1	2	1	5	1	1	1,2,4,5	7.5	2.4	4.23	8	0	N/A
2012	60	1	1	2	5	2	3	1,2,10	7.3	2.25	89.6	17	98	N/A
2019	51	1	1	13	1	1	1	2,4	8.6	3.07	8.3	178	10	N/A
2021	25	1	2	1	5	2	4	1,6,7,10,13	12.9	4.9	57.2	9	92	46,XY,t(2;4)(p23;q25),del(7p)(20)
2029	40	1	3	5	5	2	1	1,4,7	9.5	3.67	41.2	47	52	N/A
2037	27	1	5	1	5	2	4	2,4,7,9	7.9	2.6	88.6	97	81	46, XY (15)
2003	53	1	2	1	2,3	2	4	1,7	8	2.91	71.45	12	97	N/A
2072	15	2	5	3	2	2	4	1,2	11.3	3.7	8.6	60	64	N/A
2081	36	1	2	3	5	2	4	1,4	13.6	4.82	24.7	26	81	46,X,-Y,+8(20)
2083	36	1	1	11	1	1	4	1,2	14.4	5.15	10.6	461	4	N/A
2084	42	1	1	2	5	2	4	3,4	12.3	4.56	56	33	65	46, XY,del(7q),+8,-15 [20].
2091	7	1	5	3	5	2	4	1,2,3	5.9	1.9	1.5	35	71	N/A
2160	22	1	1	3	5	2	4	1,4	3.8	1.03	43.7	10	0.69	46, XY (15)
2146	65	1	5	3	5	2	2	1,4,5	9.5	2.9	4.8	202	0.71	N/A
2599	30	2	2	2	5	2	4	1,2,3	6.6	2.41	7.58	14	57	Complex Karyotype. 47,XX,+8(01)/46,XX,+8,-14, der(21;21)(q10;q10)(07)/45,XX,+8.-14,-20,der(21;21)(q10;q10)(03)/46,XX(03)
2105	50	1	5	5	5	2	4	1,6,7	9.3	3.22	92.8	21	0.7	N/A
3372	32	1	2	10	5	1	1	4,5,6,9	6.1	2	28.9	35	0.12	N/A
3376	16	2	2	2	5	2	1	1,4	9.9	3.25	36.6	28	0.92	N/A
1469	36	2	4	3	6	2	4	1,2	7	2	3.5	12	40	46,XX(20)
1481	40	1	5	1	5	2	1	1,2,4	10.7	3.5	2.9	54	85	46, XY (15)
1482	53	2	2	2	5	2	4	1,4	11	4.4	13.5	23	75	N/A
1493	26	2	1	13	1	1	4	2,4	9.6	3.6	1.3	174	0	NORMAL
1508	38	1	1	3	5	2	1	1,2	7.4	2.6	7.3	15	48	46, XY (15)
1516	47	1	2	3	5	2	1	1,5,8	11.4	4.1	2	36	40	47,XY,+21(01)[NCA]/46,XY(14)
1524	60	1	1	3	5	1	4	1,2,4	5.7	1.9	13.6	9	21	N/A
1529	44	1	5	3	5	1	4	1,2,4	5.4	1.6	16.2	71	0	46, XY (15)
1531	33	1	4	3	5	2	1	1,2,4	6.4	2.3	27.7	33	69	Culture Failure
1542	45	1	4	4	5	1	1	1,4	5	1.6	77.5	88	10	N/A
1563	32	2	2	3	5	1	1	1,5,7,10,13	8.2	3.1	19.5	9	82	N/A
1570	46	1	2	2	5	1	1	1,2,4,5	9.4	3.8	15.7	127	90	52,XY,+mar,+8,+21,+11,+19(15)
1584	17	2	1	3	5	2	4	1,2	11.1	3.63	22.8	201	78	46,XX(20)
1613	35	2	4	1	5	2	4	1,2,4,6,9	7.8	2.86	60.15	113	81	N/A
1679	28	1	1	15	5	1	1	2,4	5.2	1.7	10.24	10	32	N/A
1685	52	1	1	3	5	1	4	4,5	7.7	2.5	16.2	6	35	46, XY (15)
1701	70	1	2	3	2	1	4	1,2,10,13	6.6	2.27	150	396	21	46, XY (15)
1726	15	1	2	3	5	2	1,3	1,2,3,4	6.4	2.3	40.9	21	69	N/A
1747	42	1	2	1	5	2	4	1,2,5,9	7	2.4	2.67	24	92	N/A
3037	49	1	1	3	3,4	2	4	2,4	13.7	4.68	65.87	71	0.82	45,XY,-7(16)/46,XY(04)
3235	24	2	1	3	5	2	4	2,4	9.2	2.69	1.78	35	0.72	46,XX(20)
3044	15	2	2	3	5	1	1	4	7.8	2.9	3.1	31	0.41	46~94 hyperdiploidy(07)/46,XX(13)
3053	27	2	5	4	5	2	4	1,6	11	3.55	66.2	41	0.34	46,XX(20)
3057	38	2	3	14	1	1	4	1,4	12.8	4	2.78	165	0	N/A
3064	25	2	1	1	5	2	4	1,4,5	7.3	2.6	40.1	32	0.89	46,XX(20)
3078	17	1	5	11	1	1	1	1,4	8.9	3.34	11.91	186	0.02	N/A
3085	28	1	1	1	5	2	4	1,4,5	13.1	4.08	2.1	253	0.79	73,X,+X,Y,+1,+2,+2,+3,+3,+4,+5,+6,+6,+7,+7,+8,+8,+9,+10,+11,+12,+13,+14,+16,+16,+18,+19,+20,+21,+21(05)/46,XY(11)
3087	14	2	5	3	5	2	1	1,4	8.6	2.92	40.08	0.21	0.82	46,XX(15)
3107	23	1	1	1	5	2	1	1,4	9	3.24	1.71	155	0.77	46,XY(20)
3109	31	2	2	3	5	2	1	1,2,4	9.9	3.5	1.4	32	0.48	N/A
3150	60	1	2	3	1	2	1	1,4	8.9	2.67	4.28	54	0.3	46,XY(20)
3162	39	2	1	2	5	2	1	1,4	7.5	2.6	45.9	24	0.88	N/A
3214	40	2	3	1	5	2	1	4	7.8	2.42	1.77	38	0.64	N/A
2915	19	2	2	3	5	1	1	1,4,5,10,13	6.8	2.4	1	19	0.29	N/A
2938	31	1	1	3	5	2	1	1,4,5	6.4	2.44	14.5	12	0.72	N/A
2939	21	1	2	1	5	2	1	1,6,13	10.8	3.9	0.8	56	0.55	N/A
2944	50	2	5	1	5	2	1	1,2,4,5,6	7.7	2.35	0.7	24	0.74	N/A
2954	49	1	1	1	1	1	1	4,5,9	10.3	3.62	3.03	27	0.71	47~84 hyperploidy(07)/49,XY,+8,t(9;22)(q34;q11.2),der(22),iso(17q),+21(03)/48,XY,idem,iso(17q)(04)/47,XY,t(9;22)(q34;q11.2),+der(22),iso(17q)(06)
2966	30	2	1	3	5	2	1	4,5,6	9	2.83	10.27	16	0.56	46,XX(20)
2820	50	1	1	2	5	2	4	1,4,5,8	9.9	3.56	96.5	40	0.79	46,XY(20)
2821	16	1	1	1	5	2	1	2,3	10.5	3.72	1.14	21	0.97	Cancelled
2833	30	2	2	1	5	2	1	1,5	7.6	2.5	99.4	44	0.86	N/A
2851	22	1	4	7	5	2	1	1,2,4,10	7.8	2.7	6.3	9	0.74	N/A
2865	17	1	2	1	5	2	1	1,2,9	9.8	3.45	1.2	26	0.94	N/A
2867	35	1	2	1	5	2	4	4,5,10,13	9	5.27	18.43	28	0.83	N/A
2702	45	2	2	3	5	2	1	1,2,4	10.1	3.19	11.1	20	0.58	N/A
2714	19	1	2	1	5	1	4	4,5,6,7,10	6.6	2.11	29.1	15	0	46,XY(20)
2715	17	1	1	1	5	2	1	1,4,7	9.4	3.4	88.6	30	0.86	N/A
2723	55	1	5	2	5	2	1	1,4	8.4	3.23	0.89	177	0.49	46,XY(20)
2743	33	2	1	12	3	1	1	4,5	10.6	3.72	3.24	7	0	N/A
2774	49	2	1	14	1	1	4	1,4,5	12	3.5	5.6	55	0.15	46,XX(20)
2776	20	1	5	13	1	1	4	1,4,5	12.5	3.9	2.57	134	0.04	N/A
2682	18	1	1	1	4	2	4	1,6	10.4	3.6	1.09	64	0.9	N/A
2509	42	1	1	1	2	2	1	1,4	8.2	3.4	4.94	10	0.79	46,XY(20)
2517	48	1	4	4	2	2	1	1,4,13	7.3	2.54	76.39	11	58	N/A
2546	65	2	1	3	2	2	1	1,4,5	7.7	3.02	73.97	19	0.77	N/A
2548	44	1	5	3	1	1	4	1,4	12.8	4.77	2.89	68	0.85	46,XY(20)
2549	23	1	2	2	4	2	1	1,4	7.7	2.84	129	28	0.83	N/A
2563	32	2	1	11	1	1	4	1,4,5	11.2	3.57	11.35	247	0.01	N/A
2470	29	2	1	14	1	1	4	1,5	8.9	3.9	1.4	172	0.21	46,XX(20)
2484	32	1	2	12	4	2	1	1,4,6	5.4	1.82	19.77	7	0.3	N/A
2497	19	1	3	1	5	2	4	1,5,9	8	2.01	2.69	54	0.72	N/A
2196	57	1	1	2	5	2	1	1,4	9.1	2.87	1.09	20	0.48	46,XY,t(8;21)(q22;q22)(15)
2203	32	2	1	3	4	2	4	1,4,6	9.3	3.1	3.9	17	0.72	46,XX(15)
2224	40	1	1	4	5	1	1	1,4	6.2	2.2	147	69	0	N/A
2336	42	1	2	1	5	1	4	1,4	11.2	4	0.9	312	0.02	46,XY(20)
2386	18	1	5	1	5	2	1	1,4,7,10	7.8	3	101.2	91	0.96	N/A
		Male= 1	Urdu=1	AML with minimal differentiation=1	H/o AML=1	Yes= 1	H/o Blood transfusion=1	Fever=1
		Female= 2	Sindhi=2	AML without maturation=2	HTN=2	No= 2	Smoking=2	Pallor=2
			Punjabi=3	AML with maturation=3	DM=3		H/o Betel nuts addiction=3	Epistaxis=3
			Balochi=4	Acute myelomonocytic leukemia=4	Smoking=4		Not significant=4	Generalized weakness=4
			Pashto=5	Acute monoblastic/monocytic leukemia=5	N/Sig.=5			Weight loss=5
				Pure erythroid leukemia=6				Gum bleeding/hypertrophy=6
				Acute megakaryoblastic leukemia=7				Cervical/axillary lymphadenopathy=7
				Acute basophilic leukemia=8				Hepatomegaly=8
				Acute panmyelosis with myelofibrosis=9				Splenomegaly=9
				Acute promyelocytic leukemia=10				Hepatosplenomegaly=10
				AML in hematological remission=11				Associated with FLT3-ITD=11
				AML with myelodysplasia=12				MDS transformed AML=12
				Reduction in Primary Disease (A.M.L) Burden=13				Abdominal pain=13
				Primary disease relapse=14
				AML with recurrent cytogenetics=15
